# Supplementary material for: Effect of hydroxyurea on the promoter occupancy profiles of tumor suppressor p53 and p73
Source: PubMed Central journal article supplement (PMC2711048; doi:10.1186/1741-7007-7-35), 2009-06-26
Supplement: 1741-7007-7-35-S1.pdf [file 1741-7007-7-35-S1.pdf]

Figure S1

A

| HCT116-3(6)                        | p53               | p63              | p73              |
|------------------------------------|-------------------|------------------|------------------|
| $\beta$ -actin normalized CT value | 20.23 $\pm$ 0.005 | 30.33 $\pm$ 0.66 | 28.18 $\pm$ 0.11 |

B

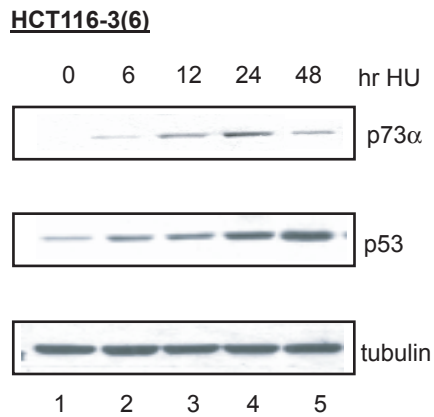

C

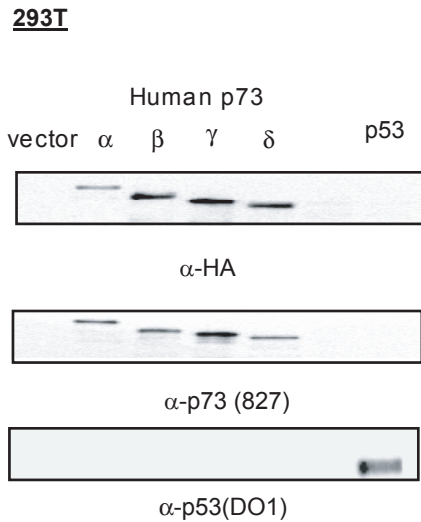

**Figure S1 - Confirmation of antibody specificity used in this study.**

**(a)** Relative expression of p53, p63, and p73 in HCT-116(3) cells. mRNA level was determined by real-time polymerase chain reaction shown as  $\beta$ -actin normalized Ct values. Error represents standard deviation from three biological samples. **(b)** Time-course of p53 and p73 induction by hydroxyurea. HCT116-3(6) cells were treated with 1 mM hydroxyurea at the indicated times. Endogenous levels of p53 and p73 were detected by immunoblotting as described in Figure 1(a). **(c)** Validation of p53 and p73 antibodies used in this study. Extracts of 293T cells transfected with empty vector, HA-tagged p53, or HA-tagged p73  $\alpha/\beta/\gamma/\delta$  were subjected to SDS-PAGE followed by immunoblotting with the indicated antibodies.

**Figure S2**

**A**

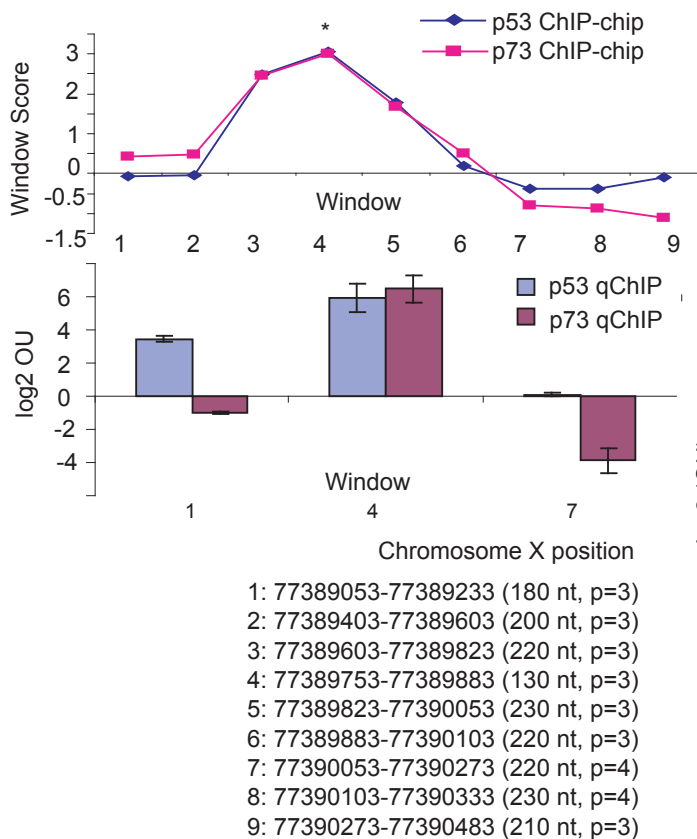

**B**

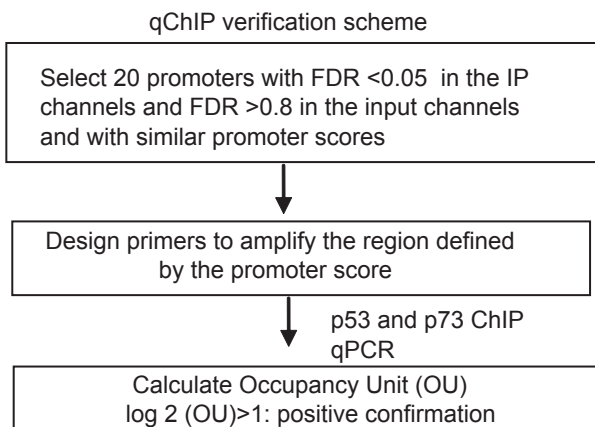

**C**

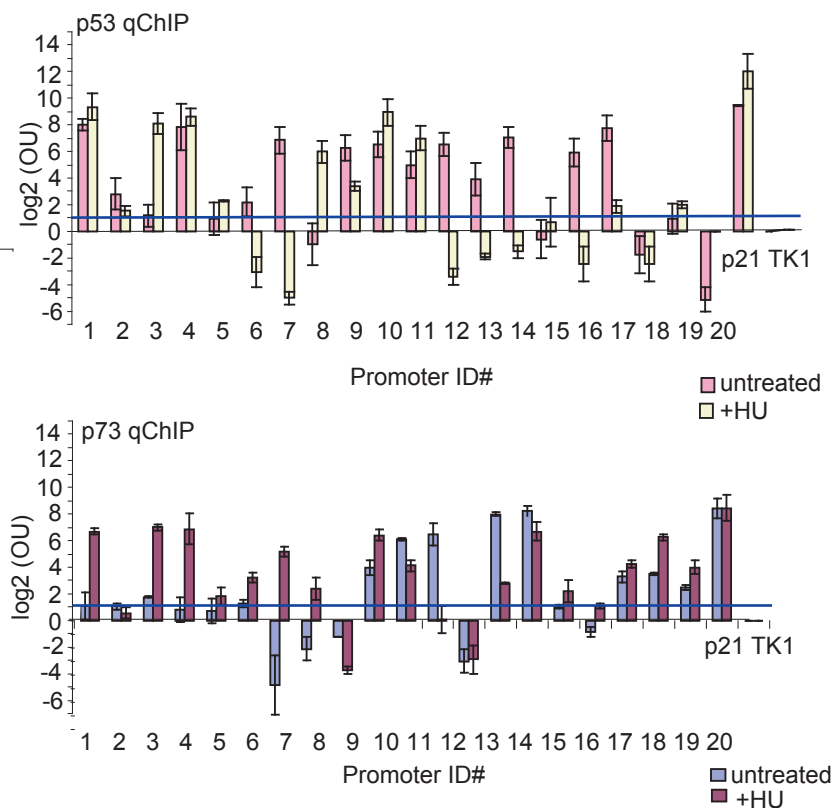

**D**

| p53 -HU          |                      |                   |           |                    |
|------------------|----------------------|-------------------|-----------|--------------------|
| MAP Computed FDR | Promoter Score Range | # false/# assayed | qChIP FDR | # promoters in bin |
| 0-0.005          | 1.22-2.15            | 2/12              | 0.17      | <b>201</b>         |
| 0.005-0.01       | 1.11-1.14            | 1/3               | 0.33      | 65                 |
| 0.01-0.05        | 0.96-0.99            | 3/5               | 0.60      | 183                |

  

| p53 +HU          |                      |                   |           |                    |
|------------------|----------------------|-------------------|-----------|--------------------|
| MAP Computed FDR | Promoter Score Range | # false/# assayed | qChIP FDR | # promoters in bin |
| 0-0.005          | 1.14-2.03            | 6/16              | 0.37      | <b>216</b>         |
| 0.01-0.05        | 0.98-1.01            | 2/4               | 0.50      | 173                |

  

| p73 -HU          |                      |                   |           |                    |
|------------------|----------------------|-------------------|-----------|--------------------|
| MAP Computed FDR | Promoter Score Range | # false/# assayed | qChIP FDR | # promoters in bin |
| 0-0.005          | 1.08-2.41            | 7/19              | 0.37      | <b>360</b>         |

  

| p73 +HU          |                      |                   |           |                    |
|------------------|----------------------|-------------------|-----------|--------------------|
| MAP Computed FDR | Promoter Score Range | # false/# assayed | qChIP FDR | # promoters in bin |
| 0-0.005          | 0.89-2.13            | 4/19              | 0.21      | <b>526</b>         |

**Figure S2. Verification of model-based algorithm for promoter array window and promoter-scores.**

**(a)** Window score verification. Quantitative chromatin immunoprecipitation (qChIP) scanning of p53 and p73 across a representative promoter region. Window scores across the indicated chromosome regions (top) and the enrichment of selected chromosome regions determined by qChIP (bottom) in a logarithmic-scale ( $\log_2$ ) are shown. \*denotes genomic region that contains a non-canonical p53 consensus sequence: GGGCTTGCTg (spacer = 32)AGGCAAGTgT (capital letters represent perfect match to the consensus sequence),  $p$  = number of probes. **(b)** Verification strategy. **(c)** Promoter-score verification. Summary of p53 and p73 qChIP verification of the 20 selected promoters in the untreated hydroxyurea (-HU) or hydroxyurea-treated (+HU) experiments. Two independent ChIPs were performed for the -HU or +HU condition using the indicated antibodies. Input and ChIP DNA were amplified by ligation-mediated polymerase chain reaction. Enrichment was expressed in terms of  $\log_2$  occupancy unit (OU). p21cip1 and TK1 were used as controls for the calculation. Data are represented as mean of the  $\log_2$  OU from two independent ChIPs +/- standard error of the mean.  $\log_2$  (OU) > 1 is considered as a positive confirmation (indicated by the blue line). **(d)** Summary table of model-based algorithm for promoter array analysis, qChIP verification, and false discovery rate determination.

**Figure S3**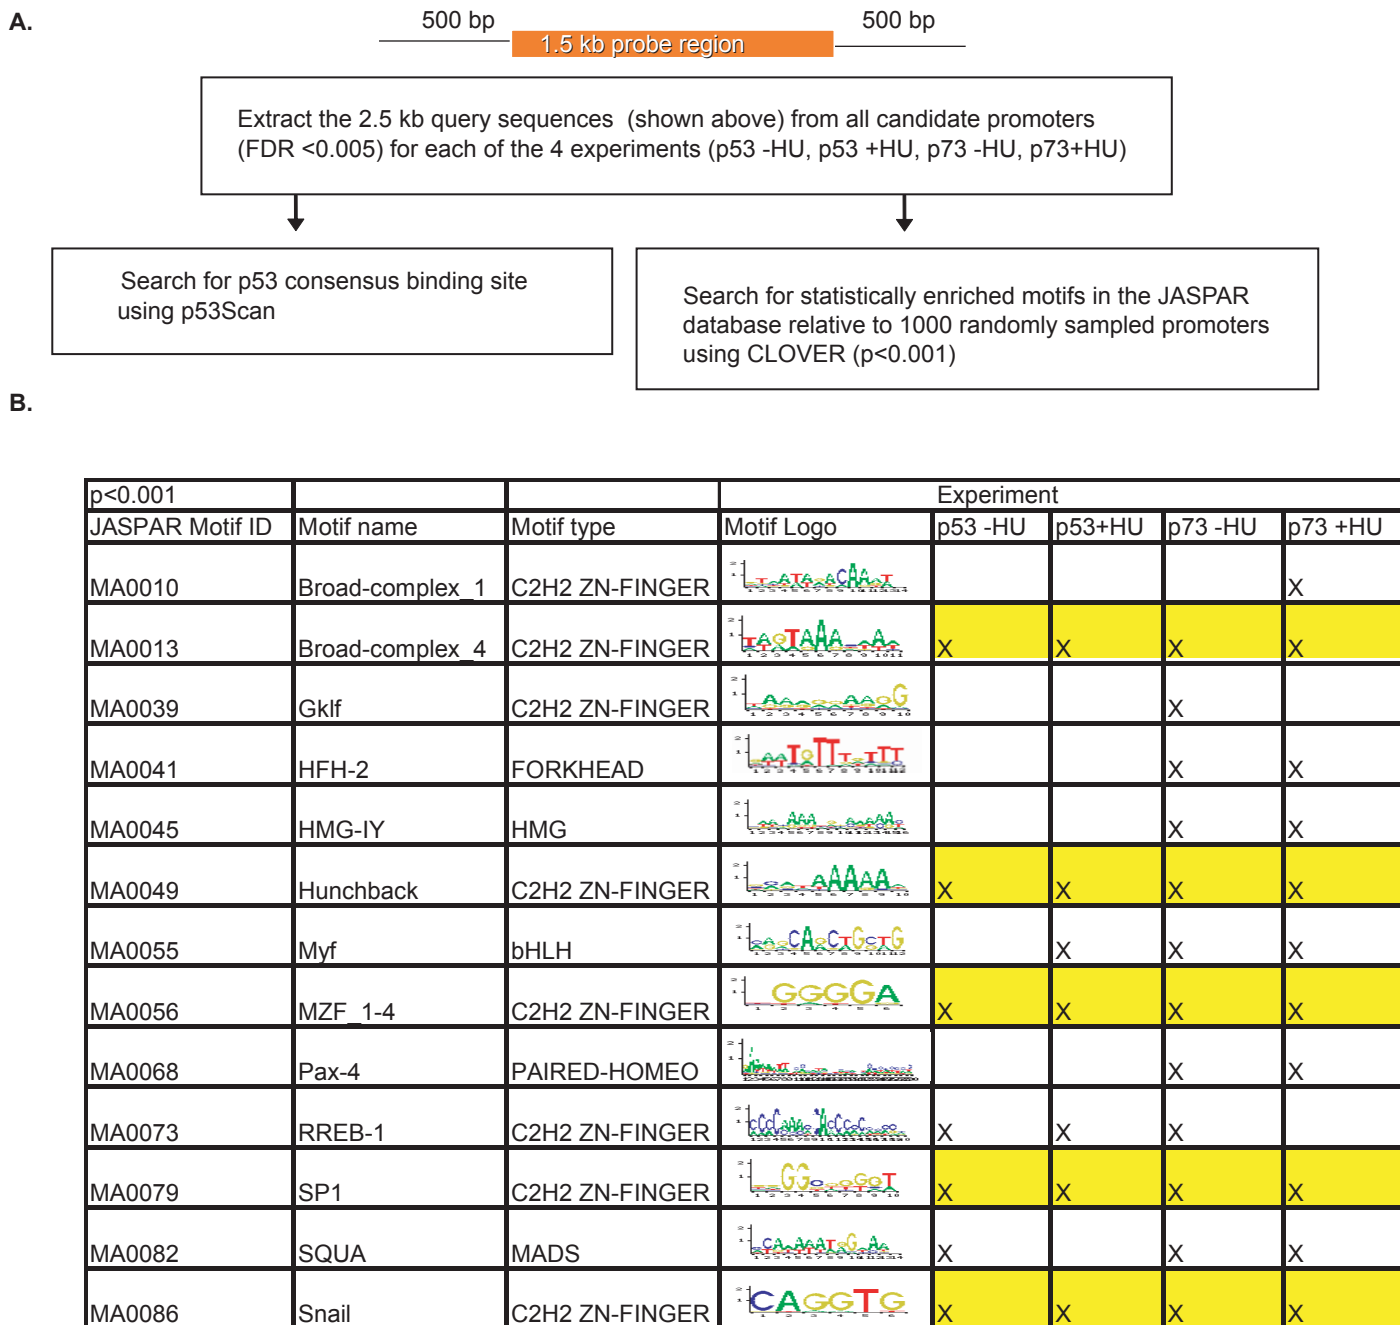**Figure S3. Motif analysis.**

**(a)** Outline of motif search for the p53- and p73-bound promoters. **(b)** Over-represented JASPAR motifs in p53 and p73-bound promoters. The sequence logo of the JASPAR motif represents the frequency of occurrence in the binding-site matrix. A motif that is over-represented with  $P < 0.001$  in the experimental set is marked by X.  $P$  values are calculated to indicate the degree of over-representation of each PSSM in target versus background sequences randomly selected from 1000 human promoters. Motifs found in all four experiments are highlighted in yellow.
