# Supplementary material for: Effect of hydroxyurea on the promoter occupancy profiles of tumor suppressor p53 and p73
Source: PubMed Central journal article supplement (PMC2711048; doi:10.1186/1741-7007-7-35), 2009-06-26
Supplement: 1741-7007-7-35-S10.pdf [file 1741-7007-7-35-S10.pdf]

Table S8

A

| NimbleGen Seq ID  | Gene Accession ID | Val. ID | Forward                        | Reverse                        | Verification on gel |
|-------------------|-------------------|---------|--------------------------------|--------------------------------|---------------------|
| HSAP0406S00027218 | AJ223280          | 1       | TCTTGCACCCCGTCTTCAC            | CCAGAGCCCTGAGGAATGAC           | Yes                 |
| HSAP0406S00021203 | NM_000040         | 2       | GCCTGCCTGGATTGAAACC            | GCACAGAAGACCAGGCATCA           | Yes                 |
| HSAP0406S00024903 | AB007865          | 3       | AGTCATCACCTCTACCTTGAAACTAGTCT  | ACACTGCTGAATCCACTCAATCA        | Yes                 |
| HSAP0406S00001733 | AY129015          | 4       | GCCAGAGGTTTAAAAAGGTTAAGATT     | GCGGCAGGACAACATGGT             | Yes                 |
| HSAP0406S00032402 | NM_032488         | 5       | AGACCAGCCTGGGCAACA             | CCCGGCTAATTCTATTTGTATTTTT      | Yes                 |
| HSAP0406S00002422 | M26316            | 6       | AGAAAGACCACGAAGACCACCTAA       | GCTGCTCCTCACAGTGCTTACA         | Yes                 |
| HSAP0406S00003249 | NM_014002         | 7       | CCCAGCTGCCCATCAAGAT            | GCCACAGAGAAGCCAGGAACT          | Yes                 |
| HSAP0406S00019175 | NM_014661         | 8       | CACACCGGACCCATTCTTTT           | GAGCGAGCTGTAGTGTGAAAGGA        | Yes                 |
| HSAP0406S00036295 | AL831883          | 9       | TCTGGGTCTGACATCAACCATT         | TGTTTCAGAAAGATAGGAGATAGCTCTGT  | Yes                 |
| HSAP0406S00034186 | AK127768          | 10      | GCTTACAACCTGGTGTGTCTTAGG       | TGCTCTCAAAGGCGGAACA            | Yes                 |
| HSAP0406S00034239 | NM_005286         | 11      | CCAGTGCTTCGAGTCCAGAAG          | GACTGCCTGTACTGGCCAAAA          | Yes                 |
| HSAP0406S00036196 | NM_006639         | 12      | CTGGAATGACTGGGCTTGCT           | CTTGCTGATCCCCAAAT              | Yes                 |
| HSAP0406S00027800 | AK122592          | 13      | GTAAGTCCCCAAACCAAGTT           | CGACTTAGCAACCCTCATAGG          | Yes                 |
| HSAP0406S00018051 | AK025655          | 14      | ACAGGGAGTGCAGTCTTAATGG         | AAAAATGCAACCACAGCTATCC         | Yes                 |
| HSAP0406S00017623 | AK124271          | 15      | GCAGCGGTACCTGACCAGAA           | CTTCTGTGCTTCTACAACCTTTTC       | Yes                 |
| HSAP0406S00008775 | BC026264          | 16      | GCTGTAATTCAGCTAATATCAATGATCTTG | TGCTACTCTTATGCACACTATTCTGAAA   | Yes                 |
| HSAP0406S00016016 | AF370371          | 17      | TTGTTCTGTTGGTGCCATGAG          | TCATGTCTGGAGGCTGAGGTT          | Yes                 |
| HSAP0406S00009756 | AK124770          | 18      | AGAAGGATAGAAATTGGGTTTGTAGAAT   | AAAACCTGCCGGCTCTGACA           | Yes                 |
| HSAP0406S00004567 | NM_138938         | 19      | TAGCTCCTCCCTGGGTCTCA           | ACCATATCCCACCAGAGAGGTAAG       | Yes                 |
| HSAP0406S00011489 | NM_000410         | 20      | TCCCCTCCCAACTGCTAATG           | CCTAACCCAGACACTGATTT           | Yes                 |
| p21cip1           | NM_078467         | n/a     | AGCCTCCCTCCATCCCTATG           | TTCTATGCCAGAGCTCAACATGTT       | Yes                 |
| TK1               | NM_003258         | n/a     | AGTCCCTCCCTGCAATCCA            | TGGGTTTCCAAGCAAGGT             | Yes                 |
| MLH3              | NM_014381         | n/a     | GGAGTCCCGCTTAACAAATTCTC        | ACGAGCCTCAAGATCCAAGGT          | Yes                 |
| ETF1              | BC014269          | n/a     | CCC CGT CAG GCT CGA AT         | AAG CCT CAG ATG TCC ACC CTA TT | Yes                 |

B

| NimbleGen Seq ID  | Gene ID   | Forward                 | Reverse                   |
|-------------------|-----------|-------------------------|---------------------------|
| HSAP0406S00013662 | NM_021223 | CAGGGCCCAGCCTCCTT       | TCCTCTCCTTATTTGGACCTTCAG  |
| HSAP0406S00031561 | NM_005583 | TGCCACCCACTTGTGATACTCA  | GCTCTTGCAAGTTGCCAGAT      |
| HSAP0406S00025741 | AB032525  | CGAGGCATGGACCTGAAAAC    | TCTTCTTGGATTCCCTATTGC     |
| HSAP0406S00022455 | AK094261  | GGCTACTGCTGCTTCAAGACAGT | TCACCAGCGCTCCTGACA        |
| HSAP0406S00034475 | NM_058186 | ACTGTTCTGGAGGAAGCAAAGAA | CAAGTTCGCCGTCCATGTC       |
| HSAP0406S00016860 | NM_006378 | AGACCTGCCCCAGGAAGTG     | TTTATTGTCCTTTTCAGGACACCAA |
| HSAP0406S00023356 | AK127211  | ACTTCTCCCCCTTCCAGAACTC  | GTCGCCGTAGCAGGTCAGA       |
| HSAP0406S00006063 | NM_024080 | GAAAGTTGCCCACTGACAATTG  | TGTCCCCTTTAAACTACACTTTGGA |
| HSAP0406S00019480 | NM_053017 | CTGCAGAGGTCATGGGAGAAG   | CTCTGGCTGCTAGGAAGCTCTT    |
